# Supplementary material for: SNARE Modulators and SNARE Mimetic Peptides
Source: MDPI journal article supplement (doi:10.3390/biom12121779), 2022-11-29
Supplement: s1 [file s1]

# SNARE modulators and SNARE mimetic peptides

Mikhail Khvotchev<sup>1,\*</sup> and Mikhail Soloviev<sup>2,\*</sup>

**Supplementary Table S1.** Properties of functional peptides modulating SNARE proteins.

| No. | Derived from <sup>1</sup>                    | Membrane fusion <sup>2</sup> | Functional effects                                                                                               | References |
|-----|----------------------------------------------|------------------------------|------------------------------------------------------------------------------------------------------------------|------------|
| 1   | VAMP (P63045) (1-93)                         | ↓                            | Inhibited synaptic transmission                                                                                  | [46]       |
| 2   | VAMP (P63045) (1-96)                         | ↓                            | Inhibited exocytosis in astrocytes                                                                               | [47]       |
| 3   | VAMP (P63045) (1-94)                         | ↓                            | In reconstituted fusion assays                                                                                   | [48]       |
| 4   | VAMP (P63045) (25-52)                        | ?                            | Cytotoxicity, aberrant SNARE complexes                                                                           | [49]       |
| 5   | VAMP (P63045) (30-47)                        | ↓                            | Also, when fused with TAT sequence                                                                               | [61]       |
| 6   | VAMP (P63045) (29-56)                        | ↓                            | In reconstituted fusion assays                                                                                   | [62]       |
| 7   | VAMP (P63045) (57-92)                        | ↑                            | In reconstituted fusion assays                                                                                   | [62]       |
| 8   | SNAP-25 (P60881) (1-180)                     | ↓                            | Inhibited synaptic transmission                                                                                  | [43]       |
| 9   | SNAP-25 (P60881) (1-197)                     | ↓                            | Inhibited synaptic transmission and insulin secretion                                                            | [43,44]    |
| 10  | SNAP-25 (P60881) (187-206)                   | ↓                            | Inhibited exocytosis in chromaffin cells and synaptic transmission                                               | [51,53]    |
| 11  | SNAP-25 (P60881) (170-189)                   | ↓                            | Inhibited synaptic transmission                                                                                  | [53]       |
| 12  | SNAP-25 (P60881) (181-206)                   | ↓                            | Inhibited exocytosis in chromaffin cells and synaptic transmission                                               | [52,53]    |
| 13  | SNAP-25 (P60881) (22-44)                     | ↓                            | Inhibited exocytosis in chromaffin cells and synaptic transmission                                               | [54]       |
| 14  | SNAP-25 (P60881) (12-17)                     | ↓                            | Acetylated, inhibited exocytosis in chromaffin cells                                                             | [55]       |
| 15  | SNAP-25 (P60881) (37-53)                     | ↓                            | Two staples added; also, when fused with TAT sequence, in reconstituted fusion assays, inhibited mucin secretion | [81,82]    |
| 16  | Syntaxin 1A (P32851) (1-265)                 | ↓                            | In reconstituted fusion assays                                                                                   | [48]       |
| 17  | Syntaxin 1A (P32851) (201-245)               | ?                            | Cytotoxicity, aberrant SNARE complexes                                                                           | [49]       |
| 18  | Syntaxin 1A (P32851) (229-251)               | ↓                            | Inhibited insulin secretion                                                                                      | [56]       |
| 19  | Syntaxin 1A (P32851) (197-219)               | ↓                            | Inhibited insulin secretion                                                                                      | [56]       |
| 20  | Syntaxin 1A (P32851) (233-245)               | ↓                            | Myristoylated, inhibited insulin secretion                                                                       | [57]       |
| 21  | Syntaxin 1A (P32851) (200-212)               | ↓                            | Myristoylated, inhibited insulin secretion                                                                       | [57]       |
| 22  | Syntaxin 1A (P32851) (162-265)               | ↓                            | Inhibited synaptic transmission                                                                                  | [58]       |
| 23  | Syntaxin 1A (P32851) (202-265)               | ↓                            | Fused with TAT sequence, inhibited insulin secretion and exocytosis in PC12 cells                                | [59,60]    |
| 24  | Syntaxin 1A (P32851) (2-16)                  | ↓                            | Munc18-1/SNARE complex assembly, inhibited synaptic transmission                                                 | [70]       |
| 25  | Discovered by screening of a peptide library | ↓                            | Ac-SAAEAFAKLYAEAFKNG-NH <sub>2</sub> , inhibited exocytosis in chromaffin cells and synaptic transmission        | [63]       |

<sup>1</sup> Protein database ID shown for each SNARE protein and the start/end position of the peptide

<sup>2</sup> Arrows pointing down indicate inhibition of membrane fusion. Question marks indicate that no definitive answer was obtained for the effect on membrane fusion, but aberrant SNARE complexes were detected
